# Supplementary material for: Emergency Craniotomy and Burr-Hole Trephination in a Low-Resource Setting: Capacity Building at a Regional Hospital in Cambodia
Source: MDPI journal article supplement (doi:10.3390/ijerph19116471), 2022-05-26
Supplement: s1 [file s1]

**Supplementary Table S1.** Baseline characteristics of the study population grouped by preoperative GCS score.

| Quantitative variables                 | All (n = 235)                                                                                               |                 |                       | Group 1: Preoperative GCS ≥ 7 (n = 198) |                     |                                        | Group 2: Preoperative GCS < 7 (n = 37) |             |                  | p-Value              |
|----------------------------------------|-------------------------------------------------------------------------------------------------------------|-----------------|-----------------------|-----------------------------------------|---------------------|----------------------------------------|----------------------------------------|-------------|------------------|----------------------|
|                                        | N (Missing)                                                                                                 | Mean (SD)       | Median (Min–Max)      | N (Missing)                             | Mean (SD)           | Median (Min–Max)                       | N (Missing)                            | Mean (SD)   | Median (Min–Max) |                      |
| Age                                    | 235 (0)                                                                                                     | 34.9 (17.3)     | 28 (12-84)            | 198 (0)                                 | 35.2 (17.5)         | 29 (12-84)                             | 37 (0)                                 | 33.5 (16.1) | 26 (15-69)       | 0.647 <sup>a</sup>   |
| Time from injury to admission (hours)  | 234 (1)                                                                                                     | 83 (213.5)      | 24 (1-2160)           | 197 (1)                                 | 90.8 (227.4)        | 24 (1-2160)                            | 37 (0)                                 | 41.4 (107)  | 24 (2-576)       | 0.553 <sup>a</sup>   |
| Time from admission to surgery (hours) | 235 (0)                                                                                                     | 21.4 (36.4)     | 8 (1-336)             | 198 (0)                                 | 22.4 (38.9)         | 9 (1-336)                              | 37 (0)                                 | 16.1 (17.9) | 7 (3-72)         | 0.499 <sup>a</sup>   |
| ISS score                              | 235 (0)                                                                                                     | 23.2 (3.6)      | 25 (16-25)            | 198 (0)                                 | 23.1 (3.7)          | 25 (16-25)                             | 37 (0)                                 | 24 (2.8)    | 25 (16-25)       | 0.144 <sup>a</sup>   |
| Admission GCS                          | 235 (0)                                                                                                     | 9.9 (2.8)       | 10 (3-15)             | 198 (0)                                 | 10.8 (2.2)          | 11 (7-15)                              | 37 (0)                                 | 5.5 (1.1)   | 6 (3-8)          | < 0.001 <sup>a</sup> |
| Preoperative GCS                       | 235 (0)                                                                                                     | 9.8 (2.8)       | 10 (3-15)             | 198 (0)                                 | 10.7 (2.2)          | 11 (7-15)                              | 37 (0)                                 | 5.3 (0.8)   | 5 (3-6)          | < 0.001 <sup>a</sup> |
| Categorical variables                  | Category                                                                                                    | All (n = 235)   |                       | Group 1: Preoperative GCS ≥ 7 (n = 198) |                     | Group 2: Preoperative GCS < 7 (n = 37) |                                        |             |                  | p-Value              |
|                                        |                                                                                                             | Count           | Percentage            | Count                                   | Percentage          | Count                                  | Percentage                             | Count       | Percentage       |                      |
| Age                                    | < 20y/ 20-34y/ 35-49y/ 50-64y/ ≥ 65y                                                                        | 41/105/29/40/20 | 17.4/44.7/12.3/17/8.5 | 36/86/24/34/18                          | 18/43/12/17/9       | 5/19/5/6/2                             | 14/51/14/16/5                          |             |                  | 0.889 <sup>c</sup>   |
| Head injury severity                   | Severe/Moderate/Mild                                                                                        | 83/101/51       | 35.3/43/21.7          | 46/101/51                               | 23.3/51/25.8        | 37/0/0                                 | 100/0/0                                |             |                  | < 0.001 <sup>b</sup> |
| Gender                                 | Female/Male                                                                                                 | 29/206          | 12.3/87.7             | 24/174                                  | 12.1/87.9           | 5/32                                   | 13.5/86.5                              |             |                  | 0.788 <sup>c</sup>   |
| Type of fracture                       | Close fracture/Open fracture/Without fracture                                                               | 130/8/97        | 55.3/3.4/41.3         | 108/8/82                                | 54.5/4.0/41.4       | 22/0/15                                | 59.5/0.0/40.5                          |             |                  | 0.441 <sup>b</sup>   |
| Trauma diagnosis                       | Epidural hematoma/Subdural hematoma/Intracerebral hematoma/Chronic                                          | 100/74/35/26    | 42.6/31.5/14.9/11.1   | 87/62/26/23                             | 43.9/31.3/13.1/11.6 | 13/12/9/3                              | 35.1/32.4/24.3/8.1                     |             |                  | 0.314 <sup>b</sup>   |
| Referral admission                     | No/Yes                                                                                                      | 88/147          | 37.4/62.6             | 72/126                                  | 36.4/63.6           | 16/21                                  | 43.2/56.8                              |             |                  | 0.427 <sup>b</sup>   |
| Polytrauma                             | No other injuries/Other moderate injuries with no need for surgery/Other injuries with the need for surgery | 68/162/5        | 28.9/68.9/2.1         | 61/132/5                                | 30.8/66.7/2.5       | 7/30/0                                 | 18.9/81.1/0.0                          |             |                  | 0.238 <sup>a</sup>   |
| Surgery type                           | Burr-hole trephination /Craniotomy                                                                          | 28/207          | 11.9/88.1             | 25/173                                  | 12.6/87.4           | 3/34                                   | 8.1/91.9                               |             |                  | 0.585 <sup>c</sup>   |

Abbreviations: GCS, Glasgow Coma Scale; ISS, Injury Severity Score.

<sup>a</sup> Mann–Whitney U test.

<sup>b</sup> Chi-Square test.

<sup>c</sup> Fisher’s Exact test if more than 20% cells have expected count less than 5 in Chi-Square test.
